# Supplementary material
Source: PubMed Central journal article supplement (PMC1747959)
Supplement: tobcont_13_4_415__1.pdf [file tobcont_13_4_415__1.pdf]

**Table A1** Summary of quit rates achieved in different anti-smoking Hotlines or Quitlines

| <b>Place of Quitline operation</b>             | <b>Type of intervention</b>                          | <b>Target population</b>                                       | <b>Quit rates (%)</b>                                                                     |
|------------------------------------------------|------------------------------------------------------|----------------------------------------------------------------|-------------------------------------------------------------------------------------------|
| California[5]                                  | Up to 7 counselling sessions and self-help materials | Callers who wanted to quit                                     | 6-months continuous abstinence                                                            |
| 10-country region in Western New York State[6] | Self-help packets and counselling                    | Callers who smoked at least 10 cig/day and wanted to quit      | 7-days point prevalence<br>9-months abstinence                                            |
| Buffalo, New York[7]                           | Self-help smoking cessation information              | Callers to the quitline                                        | 30-days abstinence<br>16.0; 12.8**                                                        |
| Scotland[8]                                    | Self-help guide, advice and information on quitting  | 10% sample of adult callers (aged $\geq 16$ ) to the Smokeline | 24-hours point prevalence<br>18.8; 15.6**                                                 |
| England[9]                                     | Advice, counselling and information pack             | Callers to the helpline                                        | 24-hours point prevalence<br>22.0*; 15.6‡                                                 |
| State of Victoria, Australia[10]               | Counselling and quitting information service         | Callers to the Quit Information Line                           | 24-hours point prevalence<br>16.9; 11.9**                                                 |
| Australia's national quitline[11]              | Quit book and counselling                            | Callers to the quitline                                        | 24-hours point prevalence<br>23.5; 17.3**<br>6-months continuous abstinence<br>7.8; 5.8** |

| Place of Quitline operation                    | Type of intervention                                                                                                                                                  | Target population                                                         | Quit rates (%)                                                                                |
|------------------------------------------------|-----------------------------------------------------------------------------------------------------------------------------------------------------------------------|---------------------------------------------------------------------------|-----------------------------------------------------------------------------------------------|
| Special telephone hotline in the United States |                                                                                                                                                                       |                                                                           |                                                                                               |
| a) Workers[23]                                 | RCT:<br>- general quitting information and cessation materials(1 <sup>st</sup> group);<br>- stage-matched counselling and cessation materials (2 <sup>nd</sup> group) | Blue-collar and white-collar workers                                      | 24-hours point<br>1 <sup>st</sup> group: 18.4<br>2 <sup>nd</sup> group: 20.3<br>overall: 19.4 |
| b) Young mothers[21]                           | Telephone counselling and stop smoking guide                                                                                                                          | Women smokers with young children (under the age of 6)                    | 7-days point pr                                                                               |
| c) African Americans[22]                       | RCT:<br>- standard quit smoking counselling and guidebook (1st group);<br>- counselling and a guidebook tailored to African American smokers (2nd group)              | African American smokers or recent quitters (past 30 days) aged $\geq 20$ | 7-days point pr<br>1st group: 14.4<br>2nd group: 16.                                          |

Note:

\*Based on intention-to-treat analysis.

\*\*Result calculated based on intention-to-treat analysis from the information available in the paper.

†Bio-chemically validated.

‡Adjusted quit rate calculated by assuming all those who refused to take part in the one-year follow up as smokers and excluding those who failed bio-chemical validation.
